# Supplementary material
Source: publisher site journal article supplement (https://www.dovepress.com/article/140976)
Supplement: Supplementary file 1 [file get_supplementary_file.php]

**Table S1.** Semi-quantitative macroscopic score for the samples evaluation  
(24 = normal; 0 = worst healing)

\*Smooth, white, indistinguishable from normal healthy cartilage.

| Categories     | Description                               |                                              | Score |
|----------------|-------------------------------------------|----------------------------------------------|-------|
| Surface        | Percent area of defect filled (%Fd)       | 100%                                         | 3     |
|                |                                           | >75%                                         | 2     |
|                |                                           | 50-75%                                       | 1     |
|                |                                           | <50%                                         | 0     |
|                | Tissue aspect (S1)                        | Normal: smooth, white*                       | 3     |
|                |                                           | >75% normal                                  | 2     |
|                |                                           | 50-75% normal                                | 1     |
|                |                                           | <50% normal                                  | 0     |
|                | Regularity (S2)                           | Regular, intact                              | 4     |
|                |                                           | Breaks (fracture)                            | 3     |
|                |                                           | Clefts (fissure)                             | 2     |
|                |                                           | Small cavities                               | 1     |
|                |                                           | Great cavities                               | 0     |
|                | Graft-recipient tissue integration (Grti) | 100% of perimeter                            | 3     |
|                |                                           | >75%                                         | 2     |
|                |                                           | 50-75%                                       | 1     |
| <50%           |                                           | 0                                            |       |
| Section aspect | Depth (Sct1)                              | At host cartilage level                      | 3     |
|                |                                           | At host subchondral bone level (eburneation) | 2     |
|                |                                           | Just underneath bone plate surface           | 1     |
|                |                                           | Deepened in the subchondral bone             | 0     |
|                | Tissue aspect (Sct2)                      | Similar to bone and cartilage                | 2     |
|                |                                           | Granulation tissue                           | 1     |
|                |                                           | Only bone (eburneation)                      | 0     |
|                | Subchondral cysts (Sct3)                  | None                                         | 3     |
|                |                                           | Mild                                         | 2     |
|                |                                           | Moderate                                     | 1     |
|                |                                           | severe                                       | 0     |
|                | Periarticular remodelling (Sct4)          | None or no pertinent                         | 3     |
|                |                                           | Mild                                         | 2     |
|                |                                           | Moderate                                     | 1     |
|                |                                           | severe                                       | 0     |

**Table S2.** Semi-quantitative histological score for the samples evaluation.  
(62 = maximum score; 0 = minimum score)

| Categories               |                                                    | Grading scale                                                                               | Score                             |   |
|--------------------------|----------------------------------------------------|---------------------------------------------------------------------------------------------|-----------------------------------|---|
| Cartilage                | Surface regularity (C1)                            | Regular                                                                                     | 1                                 |   |
|                          |                                                    | Irregular                                                                                   | 0                                 |   |
|                          | Cell type (C2)                                     | Chondroblasts-cytes                                                                         | 4                                 |   |
|                          |                                                    | Both chondroblasts and fibroblasts                                                          | 3                                 |   |
|                          |                                                    | Fibroblasts                                                                                 | 2                                 |   |
|                          |                                                    | Fibroblasts and endothelial cells                                                           | 1                                 |   |
|                          |                                                    | Empty                                                                                       | 0                                 |   |
|                          | Tissue type (C3)                                   | Mature hyaline cartilage                                                                    | 5                                 |   |
|                          |                                                    | Immature hyaline cartilage                                                                  | 4                                 |   |
|                          |                                                    | Fibrocartilage                                                                              | 3                                 |   |
|                          |                                                    | Fibrous tissue                                                                              | 2                                 |   |
|                          |                                                    | Granulation tissue                                                                          | 1                                 |   |
|                          | Bone                                               | Ossification (B1)                                                                           | Empty                             | 0 |
|                          |                                                    |                                                                                             | Lamellar bone                     | 3 |
|                          |                                                    |                                                                                             | Woven bone                        | 2 |
| Subchondral ossification |                                                    |                                                                                             | 1                                 |   |
| Absence                  |                                                    |                                                                                             | 0                                 |   |
| Cell Type (B2)           |                                                    | Osteogenic cells                                                                            | 6                                 |   |
|                          |                                                    | Osteoblasts/chondroblasts                                                                   | 5                                 |   |
|                          |                                                    | Chondroblasts/cytes                                                                         | 4                                 |   |
|                          |                                                    | Chondroblasts/ fibroblasts                                                                  | 3                                 |   |
|                          |                                                    | Fibroblasts                                                                                 | 2                                 |   |
| Morphology               |                                                    | Filling of defect (Fd)                                                                      | Fibroblasts and endothelial cells | 1 |
|                          |                                                    |                                                                                             | Empty                             | 0 |
|                          |                                                    |                                                                                             | Complete                          | 2 |
|                          |                                                    | Edges of defect (Edg)<br><i>Continuity of articular cartilage edge and filling material</i> | Partial                           | 1 |
|                          |                                                    |                                                                                             | None                              | 0 |
|                          | 2 edges , both completes                           |                                                                                             | 5                                 |   |
|                          | 2 edges, one complete                              |                                                                                             | 4                                 |   |
|                          | 2 edges, both incompletes                          |                                                                                             | 3                                 |   |
|                          | Integration between cartilage and bone plate (Int) | 1 edge complete                                                                             | 2                                 |   |
|                          |                                                    | 1 edge incomplete                                                                           | 1                                 |   |
| None                     |                                                    | 0                                                                                           |                                   |   |
| Tidemark (Tdk)           | yes                                                | 2                                                                                           |                                   |   |
|                          | partial                                            | 1                                                                                           |                                   |   |
|                          | no                                                 | 0                                                                                           |                                   |   |
|                          | Presence (complete)                                | 2                                                                                           |                                   |   |
|                          | Presence (intermitted)                             | 1                                                                                           |                                   |   |
| Vascularity              | Amount (V1)                                        | Premature/Absence                                                                           | 0                                 |   |
|                          |                                                    | None                                                                                        | 3                                 |   |
|                          |                                                    | Low                                                                                         | 2                                 |   |
|                          | Distribution (V2)                                  | Medium                                                                                      | 1                                 |   |
|                          |                                                    | High                                                                                        | 0                                 |   |
|                          |                                                    | Absence                                                                                     | 4                                 |   |
|                          |                                                    | Above level of tidemark                                                                     | 3                                 |   |
| Distribution (V2)        | Upper half of defect below tidemark                | 2                                                                                           |                                   |   |
|                          | Lower half of defect below tidemark                | 1                                                                                           |                                   |   |
|                          | Entire                                             | 0                                                                                           |                                   |   |

|                    |                                             |                       |   |
|--------------------|---------------------------------------------|-----------------------|---|
| Degeneration       | Degree of articular deterioration (D1)      | None                  | 3 |
|                    |                                             | Mild                  | 2 |
|                    |                                             | Moderate              | 1 |
|                    |                                             | Severe                | 0 |
|                    | Subchondral bone sclerosis (D2)             | None or not pertinent | 3 |
|                    |                                             | Mild                  | 2 |
|                    |                                             | Moderate              | 1 |
|                    |                                             | Severe                | 0 |
|                    | Periarticular remodeling or lipping (D3)    | None or no pertinent  | 3 |
|                    |                                             | Grade I (Mild)        | 2 |
|                    |                                             | Grade II (Moderate)   | 1 |
|                    |                                             | Grade III (Severe)    | 0 |
|                    | Subchondral bone cysts (D4)                 | None                  | 3 |
|                    |                                             | Mild                  | 2 |
|                    |                                             | Moderate              | 1 |
|                    |                                             | Severe                | 0 |
| Inflammation (Inf) | None                                        | 3                     |   |
|                    | Grade I (Mild)                              | 2                     |   |
|                    | Grade II (Moderate)                         | 1                     |   |
|                    | Grade III (Severe)                          | 0                     |   |
| Matrix staining    | Collagen staining with Azan-Mallory (Ms1)   | Marked                | 3 |
|                    |                                             | Moderate              | 2 |
|                    |                                             | Mild                  | 1 |
|                    |                                             | Premature             | 0 |
|                    | Proteoglycan staining with Safranin-O (Ms2) | Marked                | 4 |
|                    |                                             | Moderate              | 3 |
|                    |                                             | Mild                  | 2 |
|                    |                                             | Initial production    | 1 |
|                    |                                             | Premature/Negative    | 0 |
|                    |                                             |                       |   |
|                    | Collagen type II immunostaining (Ms3)       | Marked                | 3 |
|                    |                                             | Moderate              | 2 |
| Mild               |                                             | 1                     |   |
| Premature/Negative |                                             | 0                     |   |
